# Supplementary material for: The molecular mechanism of non-covalent inhibitor WU-04 targeting SARS-CoV-2 3CLpro and computational evaluation of its effectiveness against mainstream coronaviruses
Source: Royal Society of Chemistry journal article supplement (doi:10.1039/d3cp03828a), 2023-01-01
Supplement: d3cp03828a1.pdf [file d3cp03828a1.pdf]

## Molecular Mechanism of Non-covalent Inhibitor WU-04 Targeting SARS-CoV-2 3CLpro and Computational Evaluation of Its Effectiveness Against Mainstream Coronaviruses

Jianhua Wu,<sup>†</sup> Hong-Xing Zhang<sup>†,\*</sup> and Jilong Zhang,<sup>†,\*</sup>

<sup>†</sup> Institute of Theoretical Chemistry, College of Chemistry, Jilin University, Changchun 130023,  
Jilin, People's Republic of China.

**Table S1.** Binding free energy and each energy term of the SARS-CoV-2 bound WU-04 system with two different histidine protonated states were calculated using the MM/GBSA and IE methods (All values given in kcal/mol).

| System                                                   | Trajectories | $\Delta E_{vdW}$ | $\Delta E_{ele}$ | $\Delta G_{gb}$ | $\Delta G_{np}$ | $\Delta H$   | $-T\Delta S$ | $\Delta G_{bind}$ |
|----------------------------------------------------------|--------------|------------------|------------------|-----------------|-----------------|--------------|--------------|-------------------|
| 41(N <sub>δ</sub> , HD)<br>+<br>164(N <sub>ε</sub> , HE) | Run_1        | -59.40±/2.52     | -43.61±/5.70     | 66.56±/4.56     | -5.68±/0.14     | -42.14±/2.77 | 9.64±/2.82   | -32.50±/3.95      |
|                                                          | Run_2        | -57.71±/2.59     | -40.85±/5.34     | 63.80±/4.13     | -5.65±/0.15     | -40.42±/2.89 | 10.12±/1.16  | -30.30±/3.12      |
|                                                          | Run_3        | -59.44±/2.64     | -45.12±/5.03     | 66.23±/4.10     | -5.76±/0.12     | -44.09±/3.13 | 10.48±/1.71  | -33.61±/3.56      |
|                                                          | Avg±SD       | -58.85±/0.76     | -43.19±/1.56     | 65.53±/1.15     | -5.70±/0.04     | -42.22±/1.25 | 10.08±/0.29  | -32.14±/1.22      |
| 41(N <sub>ε</sub> , HE)<br>+<br>164(N <sub>δ</sub> , HD) | Run_1        | -59.20±/2.72     | -42.89±/5.57     | 66.42±/4.87     | -5.93±/0.16     | -41.61±/3.05 | 13.21±/3.77  | -28.40±/4.86      |
|                                                          | Run_2        | -56.90±/3.23     | -40.73±/7.21     | 62.73±/6.21     | -5.60±/0.24     | -40.50±/3.39 | 12.14±/4.76  | -28.36±/5.84      |
|                                                          | Run_3        | -56.23±/3.00     | -42.38±/6.44     | 63.37±/5.23     | -5.77±/0.20     | -41.02±/3.17 | 12.59±/3.61  | -28.43±/4.81      |
|                                                          | Avg±SD       | -57.44±/1.17     | -42.00±/0.85     | 64.17±/1.50     | -5.77±/0.11     | -41.04±/0.38 | 12.65±/0.38  | -28.40±/0.02      |

**Table S2.** Binding free energy and each energy terms of the SARS-CoV-2 and eight mainstream coronaviruses with WU-04 calculated by the MM/GBSA and IE method. All values given in kcal/mol.

| System     | $\Delta E_{vdW}$ | $\Delta E_{ele}$ | $\Delta G_{gb}$ | $\Delta G_{np}$ | $\Delta H$ | $-T\Delta S$ | $\Delta G_{bind}$ |
|------------|------------------|------------------|-----------------|-----------------|------------|--------------|-------------------|
| SARS-CoV-2 | -58.85           | -43.19           | 65.53           | -5.70           | -42.22     | 10.08        | -32.14 ±/ 1.22    |
| Alpha      | -59.55           | -50.53           | 71.39           | -5.73           | -44.43     | 15.91        | -28.52 ±/ 4.12    |
| Beta       | -58.51           | -40.62           | 64.37           | -5.70           | -40.45     | 10.29        | -30.17 ±/ 4.14    |
| Gamma      | -59.71           | -48.06           | 70.56           | -5.74           | -42.96     | 12.53        | -30.43 ±/ 4.41    |
| Delta      | -60.43           | -44.39           | 66.26           | -5.80           | -44.37     | 13.86        | -30.51 ±/ 4.74    |
| Omicron    | -59.54           | -44.42           | 67.13           | -5.81           | -42.64     | 10.22        | -32.42 ±/ 3.44    |
| Lambda     | -58.07           | -47.04           | 68.48           | -5.59           | -42.23     | 13.14        | -29.09 ±/ 3.76    |
| SARS-CoV   | -59.49           | -42.26           | 66.36           | -5.74           | -41.13     | 8.77         | -32.36 ±/ 4.29    |

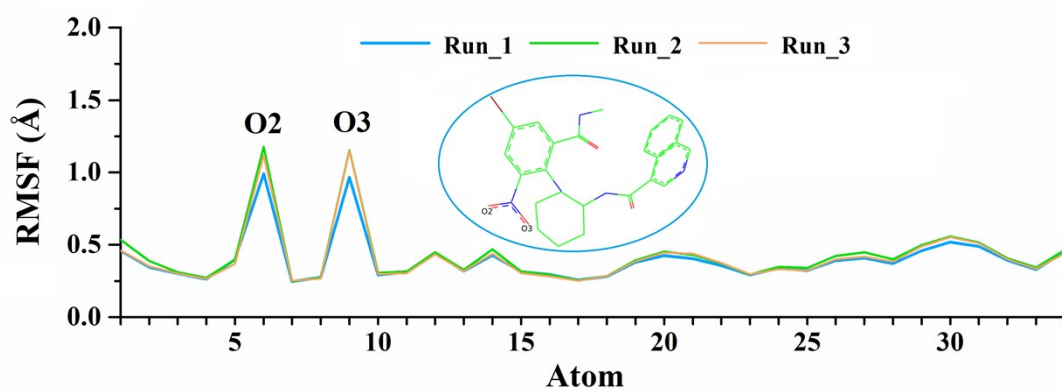

**Figure S1.** RMSF of the backbone atoms for WU-04. Three repeated MD simulation trajectories of *holo*-3CLpro system are showed and atoms with positional fluctuations near 1 Å are labeled and are shown in black in the figure.

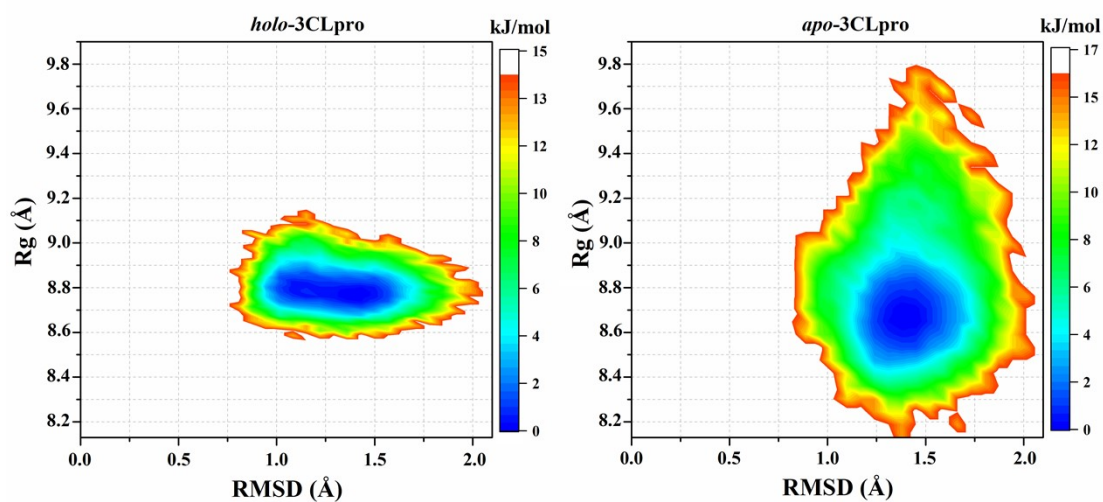

**Figure S2.** Free energy landscapes as a function of RMSD with  $R_g$  values of specific residues near the ligand-binding pocket for the *holo*-3CLpro and *apo*-3CLpro systems.

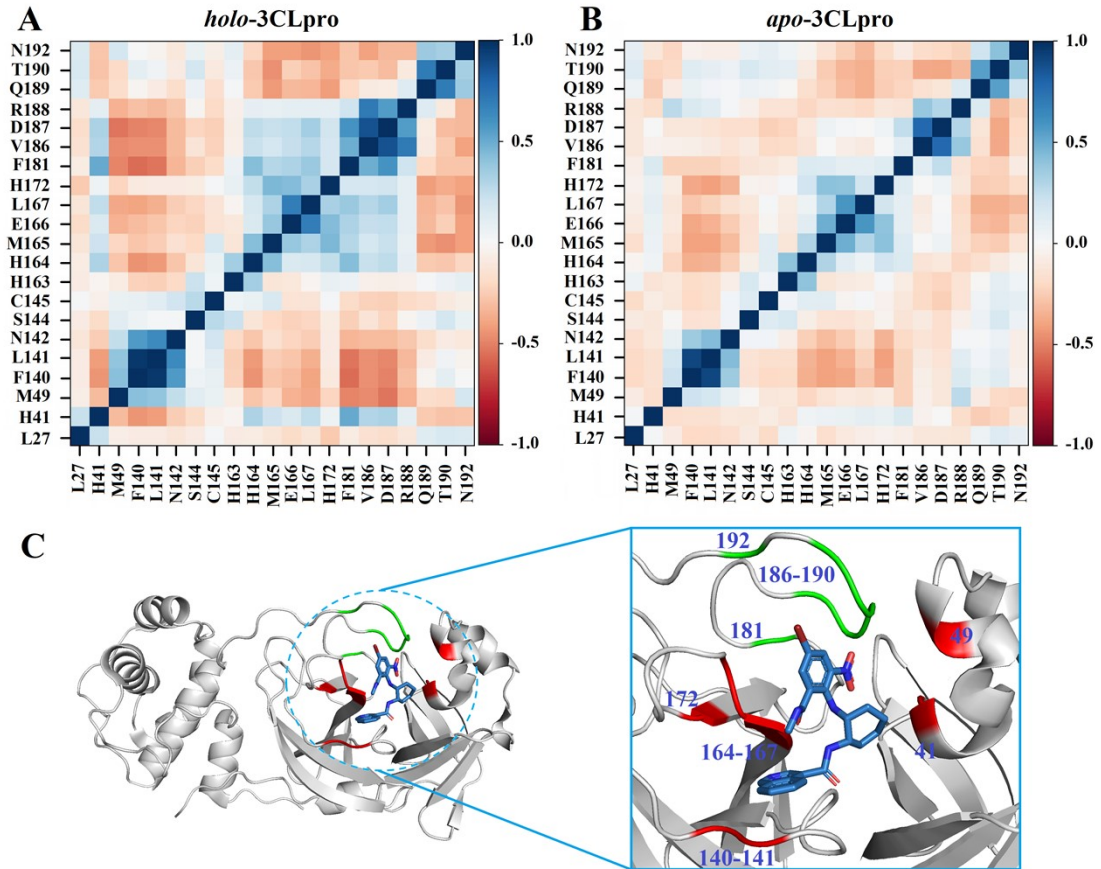

**Figure S3.** Dynamic cross-correlation maps of residues near the 3CLpro binding pocket for the (A) *holo*-3CLpro and (B) *apo*-3CLpro. (C) Plot of key residues with correlated and anti-correlated motions near the binding pocket.

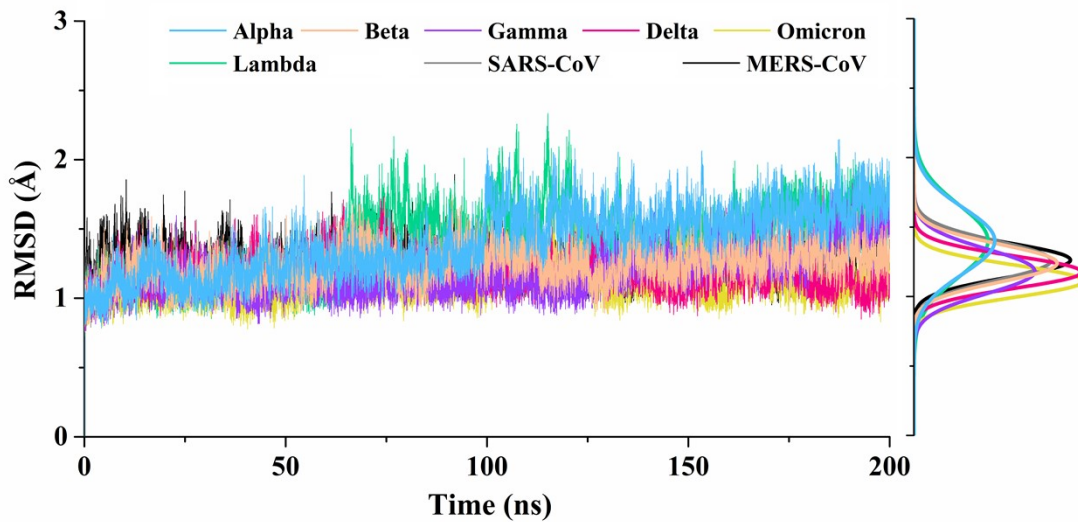

**Figure S4.** Root mean square deviation (RMSD) of the backbone atoms for the eight mainstream coronavirus Alpha, Beta, Gamma, Delta, Omicron, Lambda, SARS-CoV, and MERS-CoV systems during the MD simulation. The frequencies of the RMSD values for each system are shown on the right of the figure.

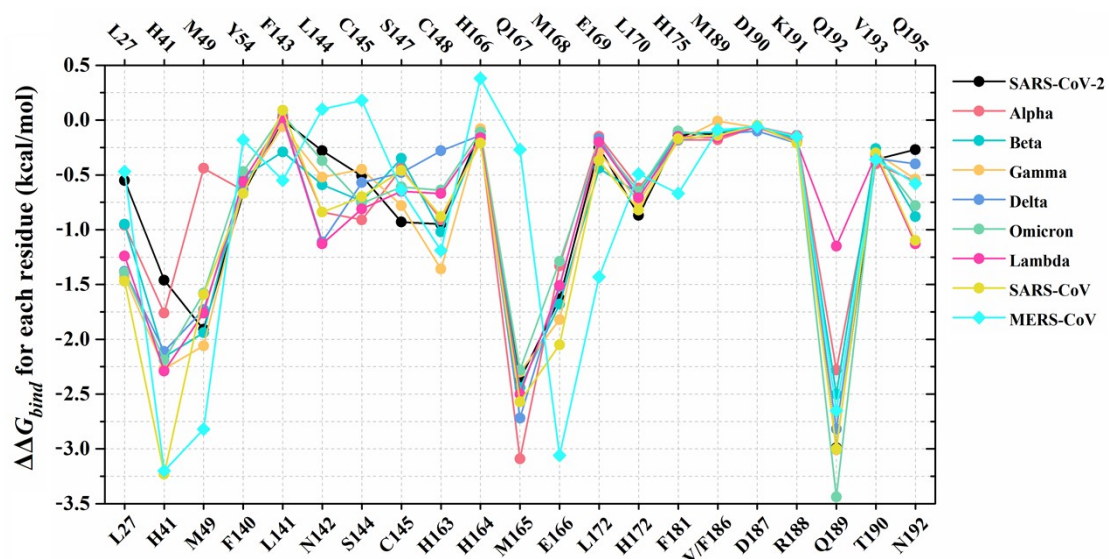

**Figure S5.** The energy contributions of residues near the binding pocket for SARS-CoV-2 and its six variants and two additional mainstream coronaviruses when interacting with WU-04. As the sequence of the 3CLpro protein of MERS-CoV differs considerably from that of other systems, residues near its binding pocket and their affinity contributions were labeled on the top of the X-axis and shown as diamond (cyan).
